# Supplementary figures and images for: Affinity Capture Enrichment versus Affinity Depletion: A Comparison of Strategies for Increasing Coverage of Low-Abundant Human Plasma Proteins
Source: MDPI journal article supplement (doi:10.3390/ijms21165903), 2020-08-17

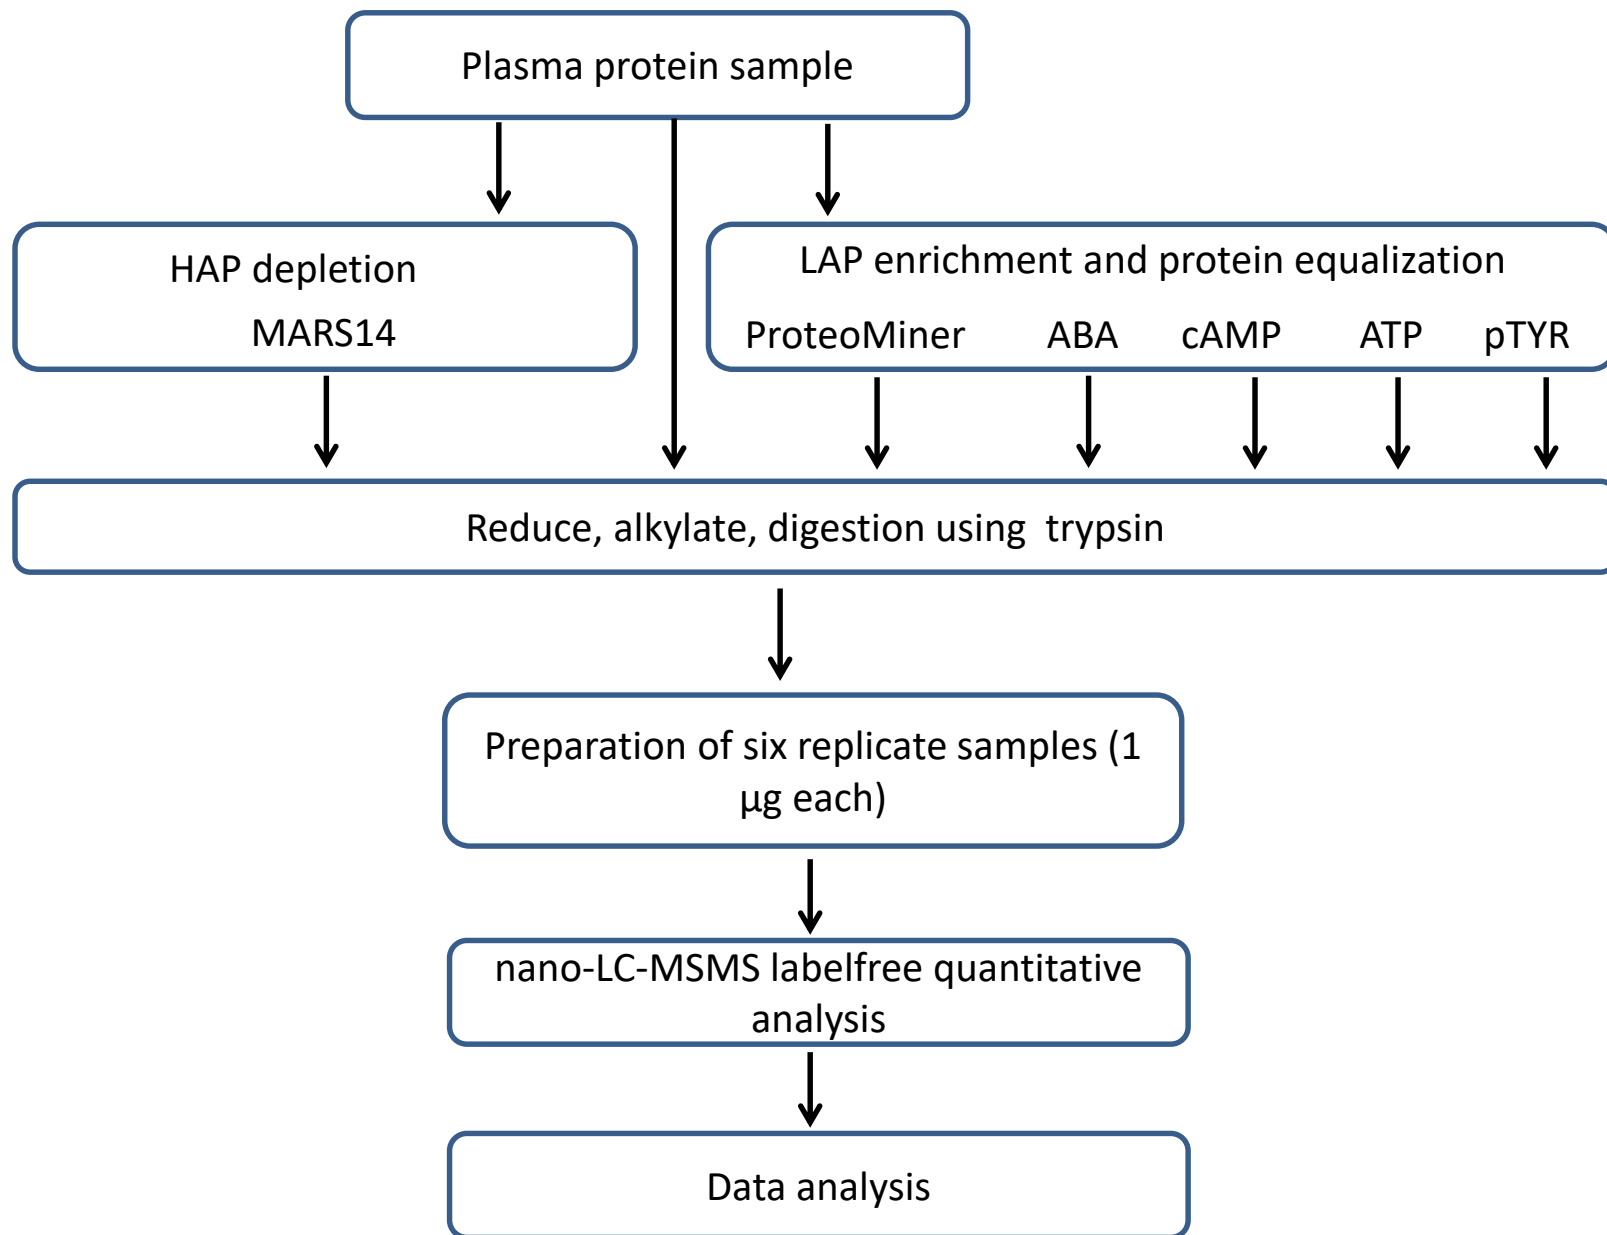

**Supplementary Figure S1: Schematic overview of the experimental design**

Supplement: s1 [file s1]
